# Supplementary material for: Dual-Located WHIRLY1 Interacting with LHCA1 Alters Photochemical Activities of Photosystem I and Is Involved in Light Adaptation in Arabidopsis
Source: PubMed Central journal article supplement (PMC5713321; doi:10.3390/ijms18112352), 2017-11-07
Supplement: ijms-18-02352-s001.pdf [file ijms-18-02352-s001.pdf]

# Supplementary Materials: Dual-Located WHIRLY1 Interacting with LHCA1 Alters Photochemical Activities of Photosystem I and is Involved in Light Adaptation in Arabidopsis

Dongmei Huang, Wenfang Lin, Ban Deng, Yujun Ren, and Ying Miao

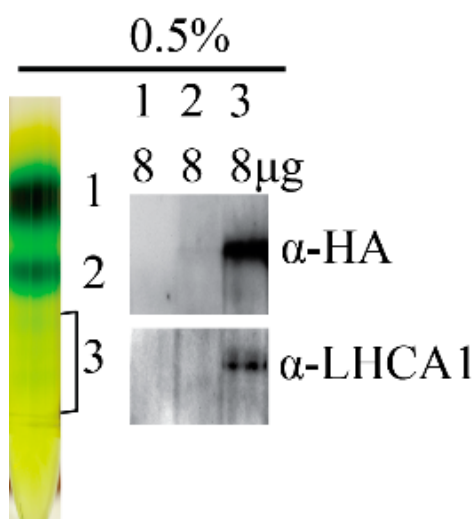

**Figure S1.** Sucrose density gradient ultracentrifugation of pigment protein complexes prepared from thylakoids solubilized by 0.5% dodecyl- $\alpha$ -D-maltoside. Band 1 consists of free pigments. Band 2 contains LHCII and photosystem II complexes. Band 3 contains photosystem I complexes. Proteins from fractions 1–3 were used for immunological analysis. The blot was immunodecorated with the HA-tag antibody, followed by immunodecoration with an antibody specific for the LHCA1 (22 kD).

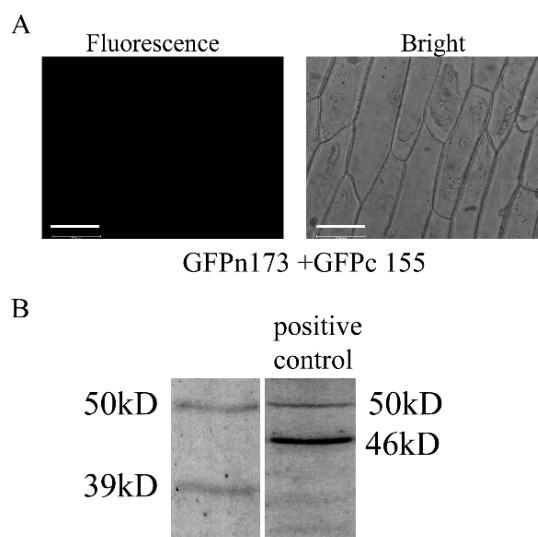

**Figure S2.** Negative controls for interaction of WHY1 and LHCA1. **(A)** Co-expression GFPn173 and GFPc155 without any fusions in onion epidermal cells. Fluorescence images are shown on the left and bright field images are shown on the right side, respectively. Scale bar 77.6  $\mu$ m. **(B)** Immunodetection of the constructs (WHY1-GFPn173+LHCA4-GFPc155) or positive control (WHY1-GFPn173+WHY3-GFPc155) expression in the cells with the antibody against the full length GFP.

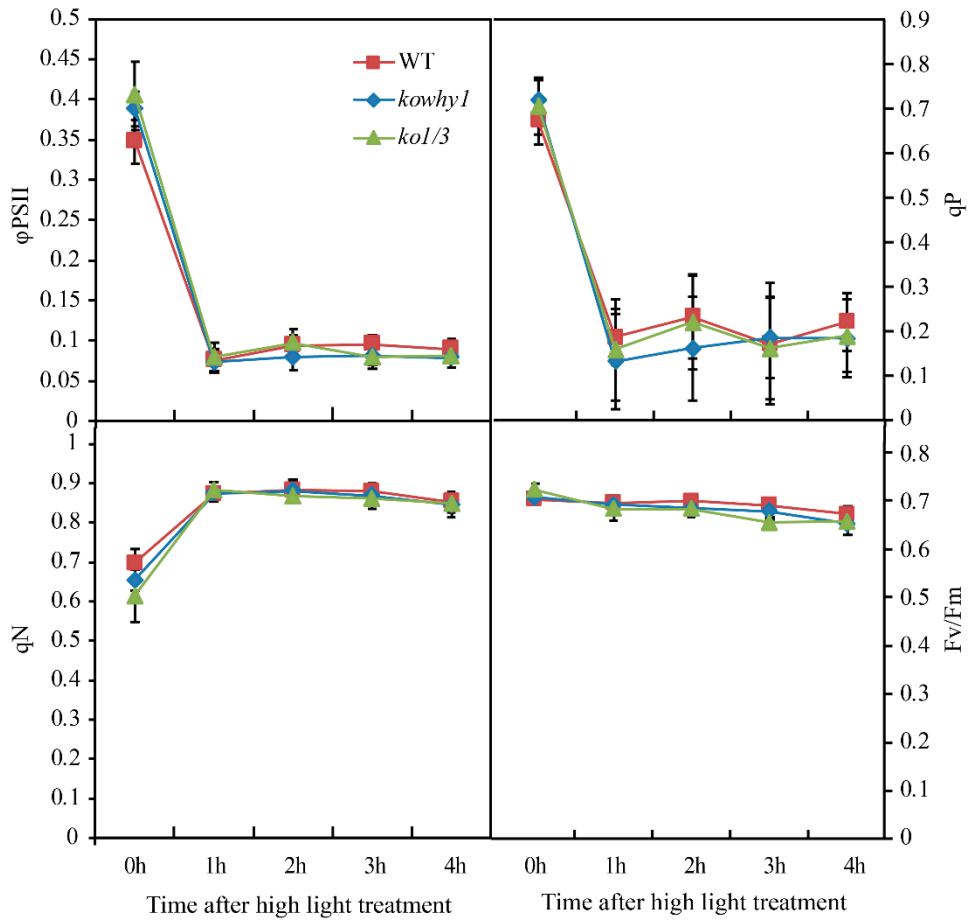

**Figure S3.** Photosynthetic parameters of *WHY1* mutants after high light treatment. Quantum efficiency of PSII ( $\Phi_{PSII}$ ); photochemical quenching ( $qP$ ); non-photochemical quenching ( $qN$ ); maximum efficiency of PSII ( $Fv/Fm$ ) in *WHY1* mutants under high light for 1, 2, 3, 4 hours. Means and SD of at least 10 independent measurements are shown.

**Table S1.** Primers for quantitative PCR.

| TAIR number      | Gene Name    | Primer sequence (5'-3')     |
|------------------|--------------|-----------------------------|
| <i>AT3G54890</i> | <i>LHCA1</i> | FP:GCCGGAATGTTGGTCGTATCAG   |
|                  |              | RP:CAAACCCAAAGTCACCAGGAGCAG |
| <i>AT3G61470</i> | <i>LHCA2</i> | FP:GTCTTGAAGGTCAACAACGTCGAG |
|                  |              | RP:ACCACCCAAGAACTTGGAGAAG   |
| <i>AT1G61520</i> | <i>LHCA3</i> | FP:AAACCAGTTGCGTCTGCCTCAC   |
|                  |              | RP:ATGGTCTGTTGGCTCCTTGCTTG  |
| <i>AT3G47470</i> | <i>LHCA4</i> | FP:CCGCTTAACTTTGCTCCTACGC   |
|                  |              | RP:AACATCGCCAACCTCCCGTTG    |
| <i>AT1G45474</i> | <i>LHCA5</i> | FP:AGAGCTTGTTCACTCTCGTTTCGC |
|                  |              | RP:TGTGGTCCGAAGGAGATCAGTG   |
| <i>AT1G19150</i> | <i>LHCA6</i> | FP:GGTTTCGATCCTCTCGGTTTAGGG |
|                  |              | RP:ACCTAACCGCTCGAGACATTCTG  |
| <i>ATCG00350</i> | <i>PsaA</i>  | FP:AGCGAGCACCAGTTTGACTTGG   |
|                  |              | RP:AAGCTACTTTGCCACCCACTGC   |

---

|                  |               |                                                            |
|------------------|---------------|------------------------------------------------------------|
| <i>ATCG00340</i> | <i>PsaB</i>   | FP:AATTTTCCTGGCGTGTTATTGGC<br>RP:CGTTCATGAGCCCACGCTAAAAG   |
| <i>ATCG01060</i> | <i>PSAC</i>   | FP:TTCTGCTCCAAGAACCGAGGAC<br>RP:GTTGGACAGGCGGATTCACATC     |
| <i>AT4G02770</i> | <i>PSAD-1</i> | FP:AACACACCGTCTCCGATCTTCG<br>RP:ACTCTTCCACTTGCGCTTTACG     |
| <i>AT1G03130</i> | <i>PSaD-2</i> | FP:AGCCGTGAAAGAAGCTCCAGTTG<br>RP:CTTCCGGCGAAGATTGGTGATG    |
| <i>AT4G28750</i> | <i>PSaE-1</i> | FP:AGTTGTTGCCGTTGATCAGGAC<br>RP:CCCATTTAAGCTGCAACTTCTTCG   |
| <i>AT2G20260</i> | <i>PSaE-2</i> | FP:AGTTGTGGCCGTTGATCAGGAC<br>RP:TTCTTCCACCTCGTCCAATGCC     |
| <i>AT1G31330</i> | <i>PsaF</i>   | FP:CTCTTGCTCTCAATGCTCAGATCG<br>RP:ACTTCCCGTAGTTGTGGAACCTG  |
| <i>AT1G55670</i> | <i>PsaG</i>   | FP:CCATCTCATTCATGGCCTTCGTC<br>RP:TCCCGGTGGTTGATAGTTTGGG    |
| <i>AT3G16140</i> | <i>PsaH</i>   | FP:ACCCAAATCCATCCGGGCTAATG<br>RP:AGAGCCGTATACGTCCCATGAC    |
| <i>ATCG00510</i> | <i>PsaI</i>   | FP:TGACAACITTTCAATAACTTACCCTC<br>RP:CCATTGCAATTGCCGAAAAGA  |
| <i>ATCG00630</i> | <i>PSAJ</i>   | FP:ATGGTTCGGTTCGTTAGCAG<br>RP:GGGAAATGTTAATGCATCTGGAA      |
| <i>AT1G30380</i> | <i>PsaK</i>   | FP:GGAGCTTTGGGTGCAAAGTGTG<br>RP:GGTCGTCGACGTTACCATTATCAG   |
| <i>AT4G12800</i> | <i>PsaL</i>   | FP:CCGAGCTGTAAATCCGACAAGAC<br>RP:AAGGTACCACGCGATCAATGGG    |
| <i>AT5G64040</i> | <i>PsaN</i>   | FP:GCCTGTGATCAAAGCTCAACGC<br>RP:AAACCATGGCTGATCGTCTTCC     |
| <i>AT1G08380</i> | <i>PsaO</i>   | FP:CCGCTAAAGCCACTGCTTACTGTC<br>RP:TAGTAGCTCTCGTCACAACGTTCC |
| <i>AT2G46820</i> | <i>PsaP</i>   | FP:CCAACATTAAGCGCCAAGAACCC<br>RP:TCAACCAGTTCCTCTCAAAGCAAG  |
| <i>ATCG01100</i> | <i>NDHA</i>   | FP:GGATGGAATTTGTGGCGTCAACC<br>RP:ACGGTAACTCTCGCATTCTGC     |
| <i>ATCG00890</i> | <i>NDHB.1</i> | FP:CGGGGAGAGATTGAGCTTC<br>RP:TGGAGTGGGAGATCCTTCGT          |
| <i>ATCG00440</i> | <i>NDHC</i>   | FP:CAATTAGGAAGGGGCCGGAG<br>RP:TTGTAACCAAGCATCCCCGA         |
| <i>ATCG01050</i> | <i>NDHD</i>   | FP:TTTCTCCTTGGTTGTGGTAGTCG<br>RP:TGACCGGGAGATGTTGAAGCTG    |
| <i>ATCG01070</i> | <i>NDHE</i>   | FP:TGGTTAGGGCTTATGTGTCT<br>RP:CAGCGGCTGCAATTGCTATAA        |

---

---

|            |                  |                                                           |
|------------|------------------|-----------------------------------------------------------|
| ATCG01010  | NDHF             | FP:CCCTTTCATTCCACTTCCAGTACC<br>RP:AAAGTCCACATGCGGCGAAG    |
| ATCG01080  | NDHG             | FP:CGATACGTCATGGTACGGGG<br>RP:CGAGCCACAGAAATTGCACC        |
| ATCG01110  | NDHH             | FP:ATTCGAAGCTGCCACCGGTATG<br>RP:TCAGCCGCTATTCCTCCAATACG   |
| ATCG01090  | NDHI             | FP:TGGTCAACAAACCCTACGAGCTG<br>RP:AATGGATTCCGACCGCGAAACG   |
| ATCG00420  | NDHJ             | FP:TAGCCATCCACGACTGAAACGG<br>RP:ACGTAAAGGCCACCCTATCCAAC   |
| AT1G70760  | NDHL             | FP:ACAATCTTGGCAGCTCAACTCG<br>RP:TGCTAAGGCTGGATGGTCAATCG   |
| AT4G37925  | NDHM             | FP:AGCTGAACGTGAAGAGCAAGGG<br>RP:TGACGTGTGACACTGCTTAGCC    |
| AT5G58260  | NDHN             | FP:TATGGGTCCTCGAAGCAAAGGTC<br>RP:GGACGAAGAGAGGGAAGTAAAGCG |
| AT1G74880  | NDHO             | FP:GACAGGAGAGTATGCACTTGTGG<br>RP:AGCATATCTGTTGGGAGCCAAGC  |
| AT3G27690  | LHCB2            | FP:AGCAATGGCCACTTCAGCAA<br>RP:CGGAGGAGATCGTTGGATGG        |
| AT4G28660  | PSB28            | FP:TTCAGTCGACGGATGTGAACGC<br>RP:TGTGCTTCGCCACAATCCCTTC    |
| AT3G01440  | PNSL3            | FP:AAGCTTGAAGATGCAGCTAAGACG<br>RP:ACCGAACCAGGATCATGCCATTC |
| AT1G70580  | AOAT2            | FP:AACAAGCCGGAAAAGTCCCT<br>RP:CTGCTGGCAGAATTGTTGTCC       |
| AT4G26530  | ATFBA5           | FP:AGGCACTCTGCTTAAACCGAAC<br>RP:TATCACTTCCGGTGCAACCTTTG   |
| AT2G05100  | LHCB2.1          | FP:CAACGCCTGGTCTTACGCTA<br>RP:AACAGGGTGGTGTGGTTCA         |
| AT5G52570  | BCH II           | FP:CCTGGTCTCTGCTTCGGTG<br>RP:TGTGTGGTGTAGCTGGTGAG         |
| AT2G36890  | MYB38            | FP:CCGTATAACCCATCAACAAACCA<br>RP:GTTGTTGGCCCATCATTGTCA    |
| AT3G49120  | PRXCB peroxidase | FP:ACAATCTGTCACTTTGGCAGGAG<br>RP:TGCATTAGCGAGTTCAGGAATG   |
| AT5G01820  | SR1              | FP:TAGACACGAATCCGCAGACGAG<br>RP:TCGTCGTAGCCCTGTTGAACC     |
| AT 2G44840 | ERF13            | FP:AGCGACTTGCCGTTAAGTGTCC<br>RP:AACGGCATCACGGAGAGTGTG     |
| AT4G34410  | ERF109           | FP:TGGGCCAAGGGCTAAACTCAAC<br>RP:CAGCAGCAACAGGAGATGAAACTG  |

---

---

*AT4G01250*

WRKY22

FP: ACGGCGGAGCATAATCATCCAG

RP: TGGTTTCTGACGTGTGCTCCG

---
